# Supplementary material for: Low-Level Viremia among Adults Living with HIV on Dolutegravir-Based First-Line Antiretroviral Therapy Is a Predictor of Virological Failure in Botswana
Source: MDPI journal article supplement (doi:10.3390/v16050720), 2024-05-01
Supplement: s1 [file s1]

Supplementary Table S1a. Survival Probability by Viral load groups.

| Years | Viral Suppression | Whole LLV |
|-------|-------------------|-----------|
| 0     | 1.00              | 1.00      |
| 1     | 0.98              | 0.97      |
| 2     | 0.96              | 0.92      |
| 3     | 0.95              | 0.87      |
| 4     | 0.93              | 0.84      |
| 5     | 0.91              | 0.80      |

Supplementary Table S1b. Survival Probability by low-level viremia (LLV) ranges.

| Years | Viral Suppression | Low-LLV | Medium-LLV | High-LLV |
|-------|-------------------|---------|------------|----------|
| 0     | 1.00              | 1.00    | 1.00       | 1.00     |
| 1     | 0.98              | 0.97    | 0.97       | 0.94     |
| 2     | 0.96              | 0.93    | 0.92       | 0.88     |
| 3     | 0.95              | 0.90    | 0.86       | 0.83     |
| 4     | 0.93              | 0.86    | 0.82       | 0.79     |
| 5     | 0.91              | 0.82    | 0.77       | 0.75     |

Supplementary Table S1c. Survival Probability by the frequency of low-level viremia (LLV).

| Years | No-LLV | Single-LLV | Confirmed-LLV | Persistent-LLV |
|-------|--------|------------|---------------|----------------|
| 0     | 1.00   | 1.00       | 1.00          | 1.00           |
| 1     | 0.98   | 0.96       | 0.95          | 0.90           |
| 2     | 0.96   | 0.92       | 0.89          | 0.80           |
| 3     | 0.95   | 0.88       | 0.85          | 0.68           |
| 4     | 0.93   | 0.84       | 0.79          | 0.66           |
| 5     | 0.91   | 0.80       | 0.76          | 0.56           |
